# Supplementary material
Source: ML conference proceedings conference paper supplement (https://www.ecva.net/papers/eccv_2020/papers_ECCV/html/123710477_ECCV_2020_paper.php)
Supplement: Supplementary file 1 [file 123710477-supp.pdf]

# Geometry Constrained Weakly Supervised Object Localization

Weizeng Lu<sup>1,2</sup>, Xi Jia<sup>3</sup>, Weicheng Xie<sup>1,2</sup>, Linlin Shen<sup>1,2</sup><sup>(✉)</sup>, Yicong Zhou<sup>4</sup>, and Jinming Duan<sup>3</sup><sup>(✉)</sup>

<sup>1</sup> Computer Vision Institute, School of Computer Science and Software Engineering, Shenzhen University, China

<sup>2</sup> Shenzhen Institute of Artificial Intelligence and Robotics for Society, China

<sup>3</sup> School of Computer Science, University of Birmingham, United Kingdom

<sup>4</sup> Department of Computer and Information Science, University of Macau, China  
luweizeng2018@email.szu.edu.cn, wxie@szu.edu.cn, llshen@szu.edu.cn, x.jia.1@cs.bham.ac.uk, yicongzhou@um.edu.mo, j.duan@cs.bham.ac.uk

## 1 Mathematical Models of Different Geometric Shapes

In section 3.2 of the main paper, we have defined the mathematical model of ellipse for the model-driven mask generator. We introduce here the mathematical models for three geometric shapes (i.e. rectangle, rotated rectangle, and rotated ellipse) in detail.

**Rotated ellipse:** Given the coefficients  $(c_x, c_y, \theta, a, b)$  of a rotated ellipse, the mathematical model of a rotated ellipse can be defined as

$$\phi(x, y) = \frac{((x - c_x)\cos\theta + (y - c_y)\sin\theta)^2}{a^2} + \frac{((x - c_x)\sin\theta - (y - c_y)\cos\theta)^2}{b^2} - 1, \quad (1)$$

where  $x, y : \Omega \subset \mathbb{R}^2$ .

**Rectangle:** Given the coefficients  $(c_x, c_y, a, b)$  of a rectangle, we can represent a rectangle with the mathematical model defined as below

$$\phi(x, y) = \left| \frac{x - c_x}{a} + \frac{y - c_y}{b} \right| + \left| \frac{x - c_x}{a} - \frac{y - c_y}{b} \right| - 1. \quad (2)$$

**Rotated rectangle:** Given the coefficients  $(c_x, c_y, \theta, a, b)$  of a rotated rectangle, the mathematical model of a rotated rectangle can be defined as

$$\phi(x, y) = \left| \frac{(x - c_x)\cos\theta - (y - c_y)\sin\theta}{a} + \frac{(x - c_x)\sin\theta + (y - c_y)\cos\theta}{b} \right| + \left| \frac{(x - c_x)\cos\theta - (y - c_y)\sin\theta}{a} - \frac{(x - c_x)\sin\theta + (y - c_y)\cos\theta}{b} \right| - 1. \quad (3)$$

The inverse of the tangent function to approximate the Heaviside function, the model-driven generator can be defined as:

$$H_\epsilon(\phi(x, y)) = \frac{1}{2} \left( 1 + \frac{2}{\pi} \arctan \left( \frac{\phi(x, y)}{\epsilon} \right) \right). \quad (4)$$

## 2 Derivatives w.r.t Shape Parameters

Since  $M = H_\epsilon(\phi(x, y))$ , the derivatives of  $M$  with respect to (w.r.t.) the parameters of a geometric shape can be transformed to those of  $\phi$ . The derivative of  $M_{x,y}$  w.r.t. the parameter  $\epsilon$  can be calculated as follows

$$\frac{\partial M_{x,y}}{\partial \epsilon} = \frac{1}{\pi} \frac{1}{1 + \left(\frac{\phi(x,y)}{\epsilon}\right)^2} \frac{-\phi(x,y)}{\epsilon^2}. \quad (5)$$

We take the parameter  $a$  from detector outputs (i.e.  $c_x, c_y, \theta, a, b$ ) as an example to introduce the gradient transfer of generator for updating detector parameters, the derivatives of parameter  $a$ , i.e.  $\frac{\partial M_{x,y}}{\partial a}$ , are calculated as follows

$$\frac{\partial M_{x,y}}{\partial a} = \frac{1}{\pi} \frac{1}{1 + \left(\frac{\phi(x,y)}{\epsilon}\right)^2} \frac{\partial \phi(x,y)}{\partial a}, \quad (6)$$

For the shape of **Rotated ellipse**, the derivative  $\frac{\partial \phi(x,y)}{\partial a}$  is easily to calculate as follows

$$\frac{\partial \phi(x,y)}{\partial a} = -\frac{2((x-c_x)\cos\theta + (y-c_y)\sin\theta)^2}{a^3}, \quad (7)$$

while  $\frac{\partial M_{x,y}}{\partial c_x}$ ,  $\frac{\partial M_{x,y}}{\partial c_y}$ ,  $\frac{\partial M_{x,y}}{\partial b}$  and  $\frac{\partial M_{x,y}}{\partial \theta}$  are derived similarly as  $\frac{\partial M_{x,y}}{\partial a}$ .

For the shape of **Rectangle**, we denote  $\alpha = \alpha(c_x, a) \doteq \frac{x-c_x}{a}$  and  $\beta = \beta(c_y, b) \doteq \frac{y-c_y}{b}$ . To obtain the derivative of  $\phi(x, y)$  w.r.t. the four parameters, i.e.  $w, h, c_x, c_y$ , in Eq. (2), then the derivatives of  $\phi$  w.r.t. the four parameters can be transformed those w.r.t.  $\alpha$  and  $\beta$  as follows

$$\frac{\partial \phi}{\partial a} = \frac{\partial \phi}{\partial \alpha} \frac{\partial \alpha}{\partial a}, \quad (8)$$

where the terms alike  $\frac{\partial \alpha}{\partial a}$  are easy to derive. While the sub-gradient of  $|x|$  w.r.t.  $x$  is zero at the point  $x = 0$ , the derivative of  $\frac{\partial \phi}{\partial \alpha}$  is obtained as follows

$$\frac{\partial \phi}{\partial \alpha} = \begin{cases} 2 & \text{if } \alpha > |\beta|, \\ 1 & \text{if } \alpha = |\beta| > 0, \\ 0 & \text{if } |\alpha| < |\beta| \text{ or } \alpha = \beta = 0. \\ -1 & \text{if } \alpha = -|\beta| < 0, \\ -2 & \text{if } \alpha < -|\beta|, \end{cases} \quad (9)$$

the derivative of  $\frac{\partial \phi}{\partial \beta}$  can be similarly obtained.

For the shape of **Rotated Rectangle**, we denote  $\alpha = \alpha(c_x, c_y, a, \theta) \doteq \frac{(x-c_x)\cos\theta - (y-c_y)\sin\theta}{a}$  and  $\beta = \beta(c_y, c_x, b, \theta) \doteq \frac{(x-c_x)\sin\theta + (y-c_y)\cos\theta}{b}$ . The similar derivatives as Eq. (8) are derived as follows

$$\begin{cases} \frac{\partial \phi}{\partial a} = \frac{\partial \phi}{\partial \alpha} \frac{\partial \alpha}{\partial a}, \\ \frac{\partial \phi}{\partial c_x} = \frac{\partial \phi}{\partial \alpha} \frac{\partial \alpha}{\partial c_x} + \frac{\partial \phi}{\partial \beta} \frac{\partial \beta}{\partial c_x}, \\ \frac{\partial \phi}{\partial \theta} = \frac{\partial \phi}{\partial \alpha} \frac{\partial \alpha}{\partial \theta} + \frac{\partial \phi}{\partial \beta} \frac{\partial \beta}{\partial \theta}. \end{cases} \quad (10)$$

where the derivative of  $\frac{\partial \phi}{\partial \alpha}$  is the same as that in Eq. (9).
